# Supplementary material
Source: ML conference proceedings conference paper supplement (https://proceedings.neurips.cc/paper_files/paper/2009/hash/a67f096809415ca1c9f112d96d27689b-Abstract.html)
Supplement: Supplementary file 2 [file a67f096809415ca1c9f112d96d27689b-Supplemental.zip]

Archive with 1 entries (1 files):
- extra/NIPS2009_0858_extra.pdf
